# Supplementary material
Source: PubMed Central journal article supplement (PMC6541832)
Supplement: skz119_suppl_supplemental_figure_2.pdf [file skz119_suppl_supplemental_figure_2.pdf]

## Supplemental Figure 2.

**A.**

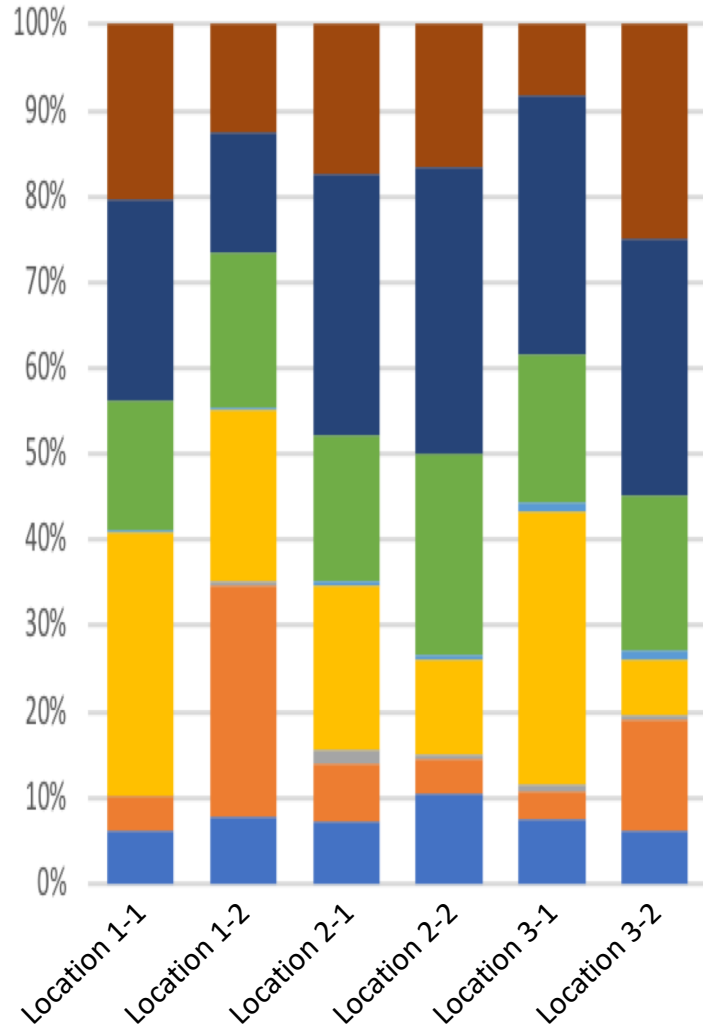

**B.**

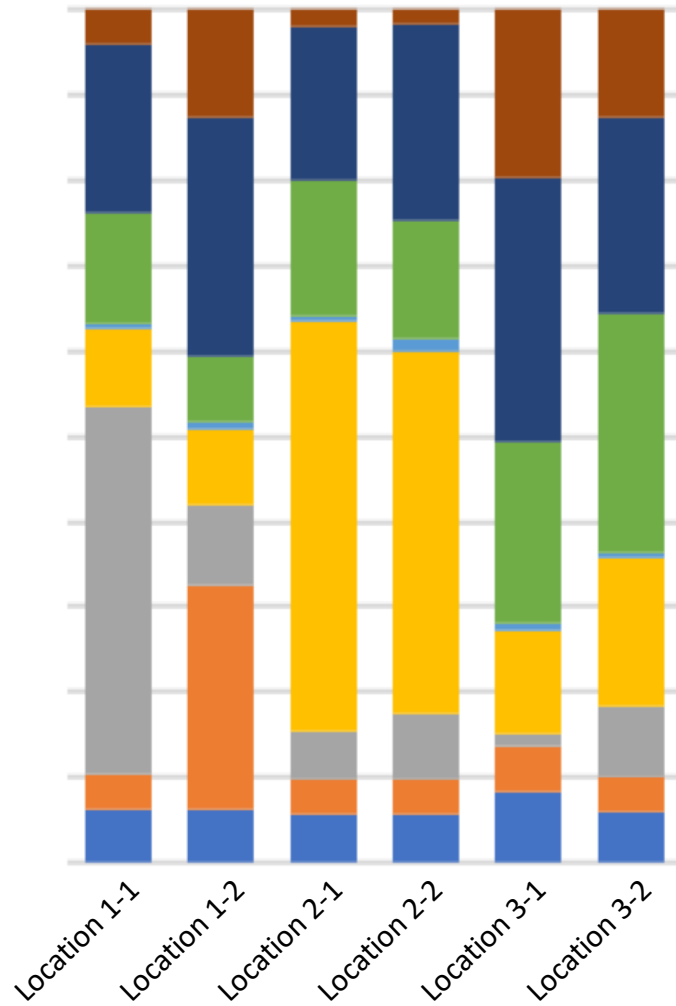

**C.**

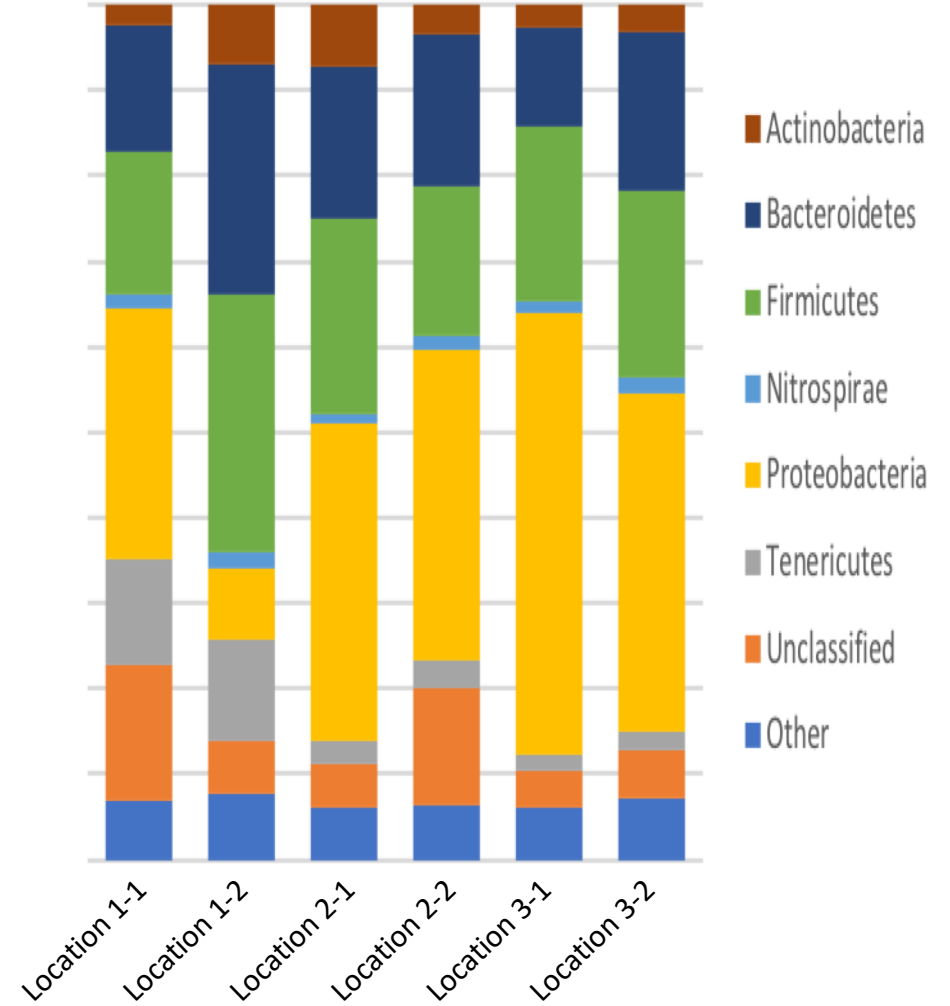

- Actinobacteria
- Bacteroidetes
- Firmicutes
- Nitrospirae
- Proteobacteria
- Tenericutes
- Unclassified
- Other
