# Supplementary material
Source: PubMed Central journal article supplement (PMC6541832)

# Supplemental Figure 1.

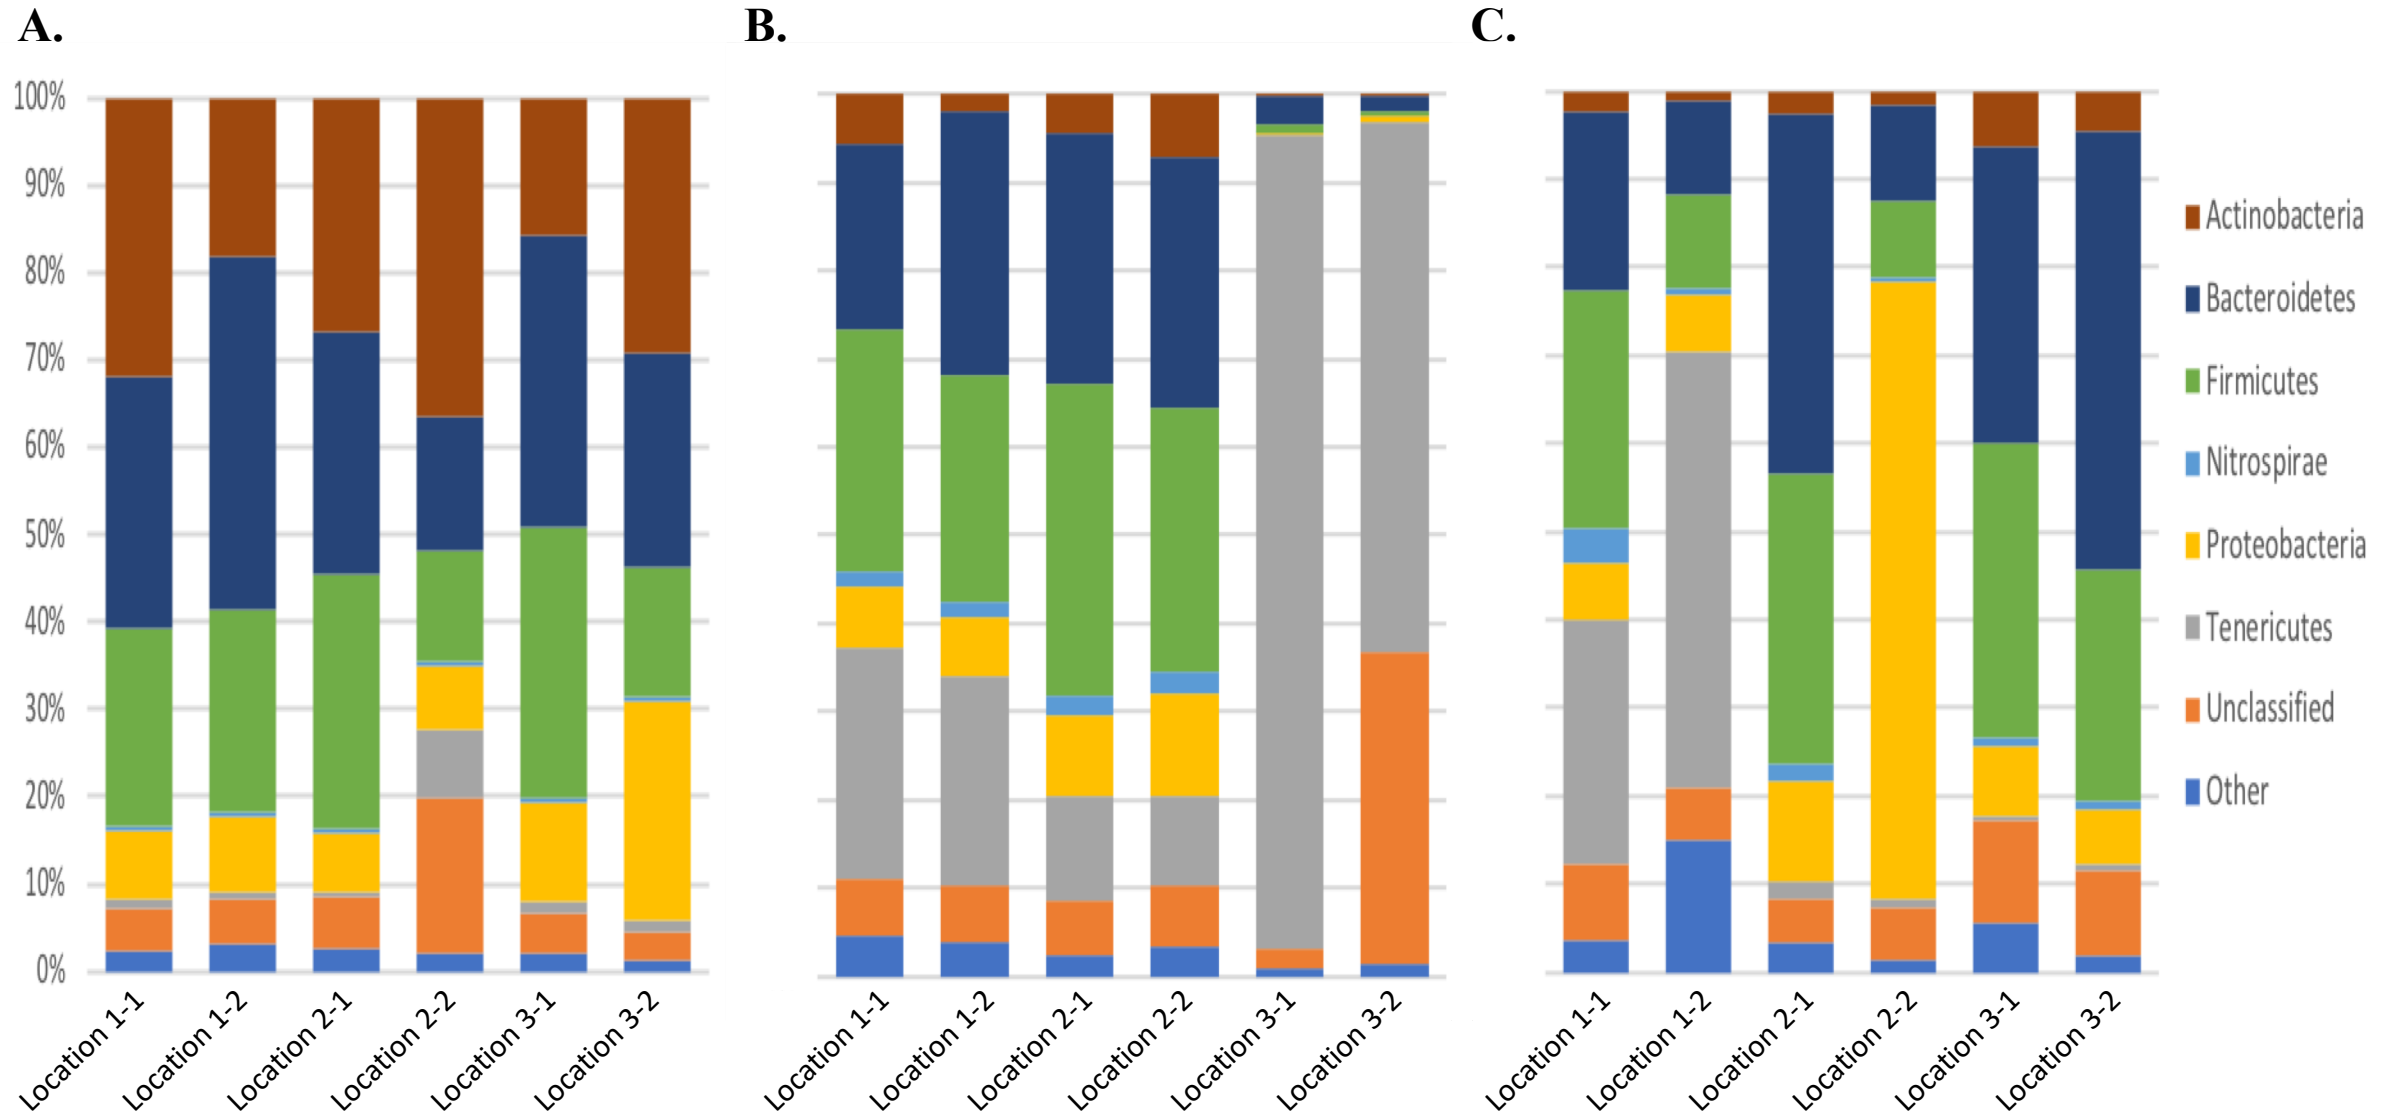

Supplement: skz119_suppl_supplemental_figure_1.pdf [file skz119_suppl_supplemental_figure_1.pdf]

### Supplemental Figure 3.

**A.**

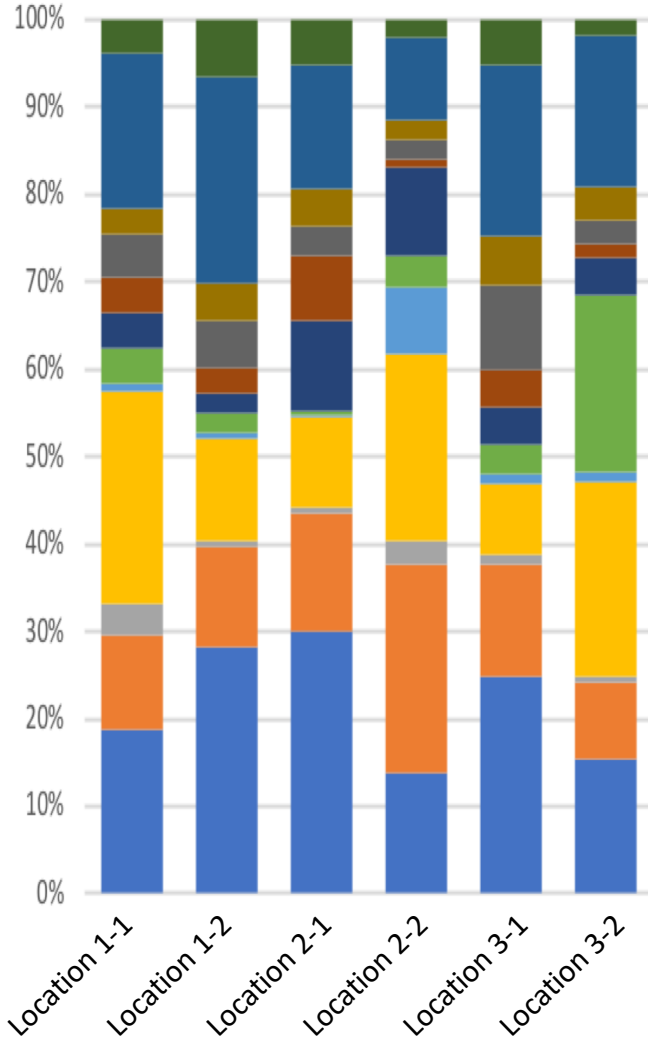

**B.**

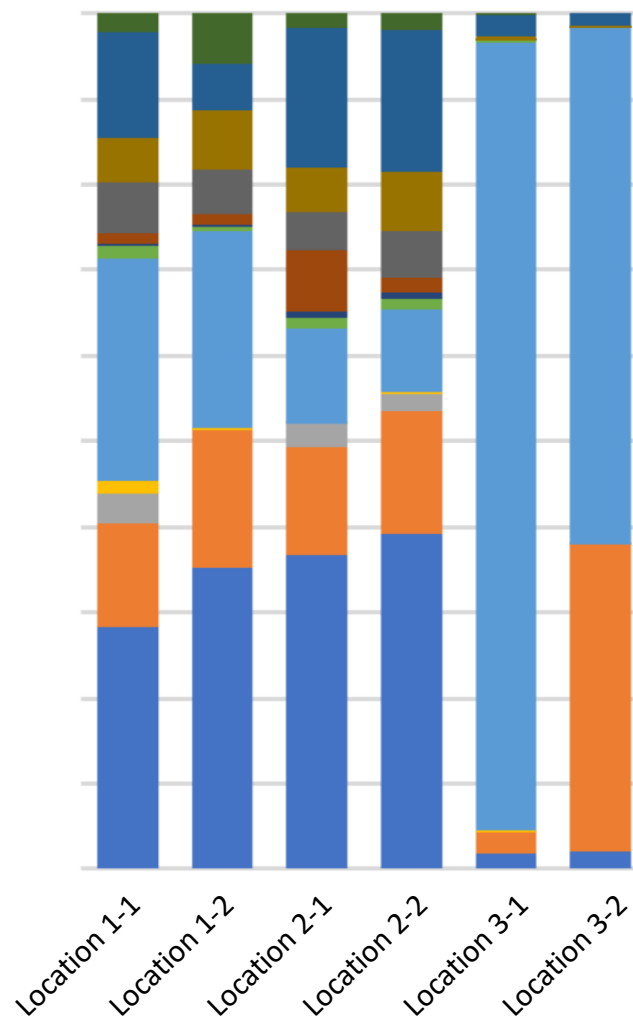

**C.**

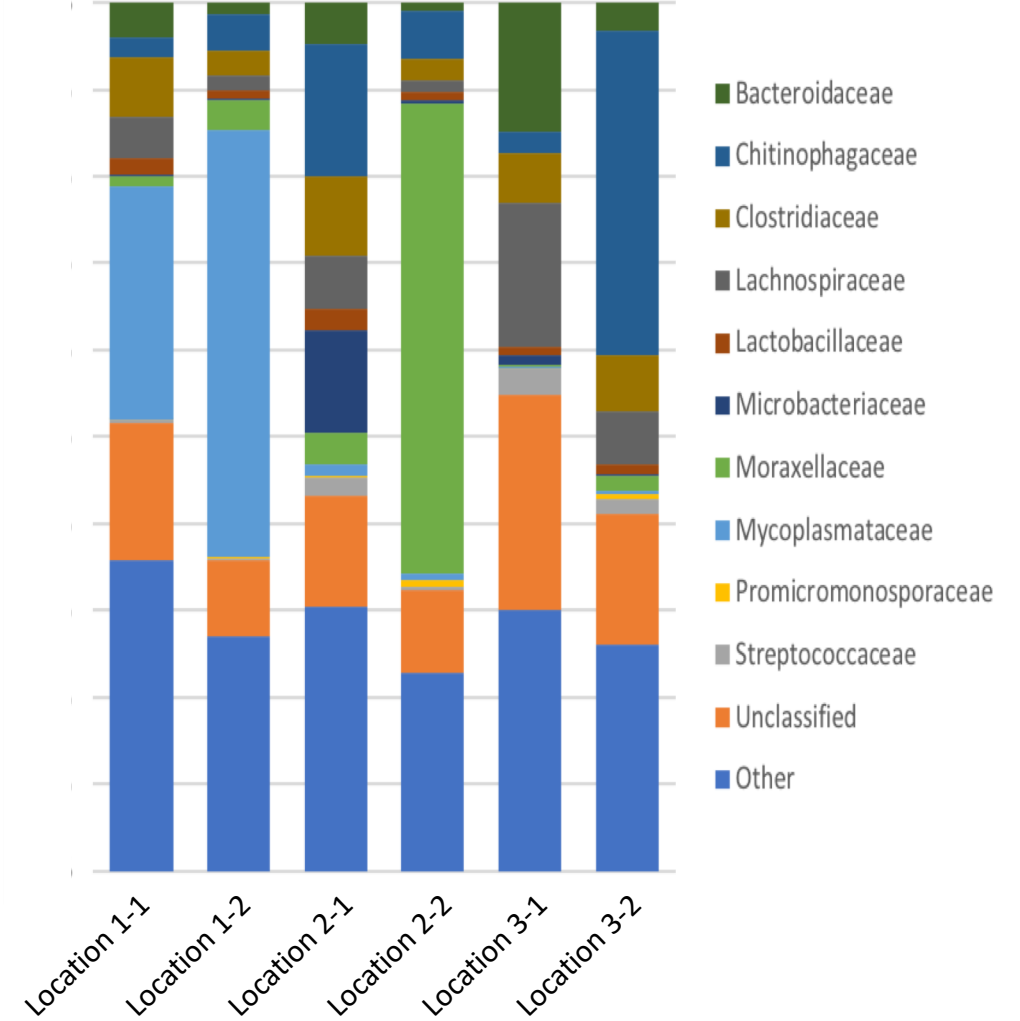

Supplement: skz119_suppl_supplemental_figure_3.pdf [file skz119_suppl_supplemental_figure_3.pdf]
